# Supplementary material for: Comparison of Whole-Cell SELEX Methods for the Identification of Staphylococcus Aureus-Specific DNA Aptamers
Source: PubMed Central journal article supplement (PMC4431181; doi:10.3390/s150408884), 2015-04-15
Supplement: sensors-15-08884-s001.pdf [file sensors-15-08884-s001.pdf]

Supplementary Information

## Comparison of Whole-Cell SELEX Methods for the Identification of Staphylococcus Aureus-Specific DNA Aptamers. *Sensors* 2015, 15, 8884-8897

Jiheon Moon, Giyoung Kim \*, Saet Byeol Park, Jongguk Lim and Changyeun Mo

National Academy of Agricultural Science, 310 Nongsaengmyeong-ro, Wansan-gu, Jeonju 560500, Korea; E-Mails: mmir95@gmail.com (J.M.); veryvenus0911@gmail.com (S.B.P.); limjg@korea.kr (J.L.); cymoh100@korea.kr (C.M.)

\* Author to whom correspondence should be addressed; E-Mail: giyoung@korea.kr; Tel.: +82-63-238-4111; Fax: +82-63-238-4105.

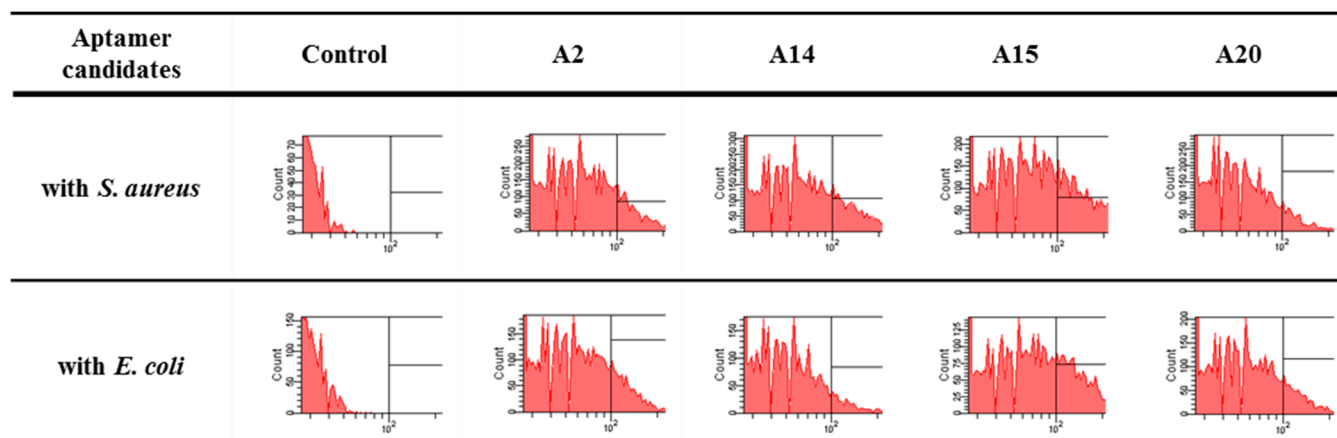

**Figure S1.** FACS analysis used to monitor the binding of FAM-aptamers to target/non-target bacteria in the basic whole-cell SELEX procedure.

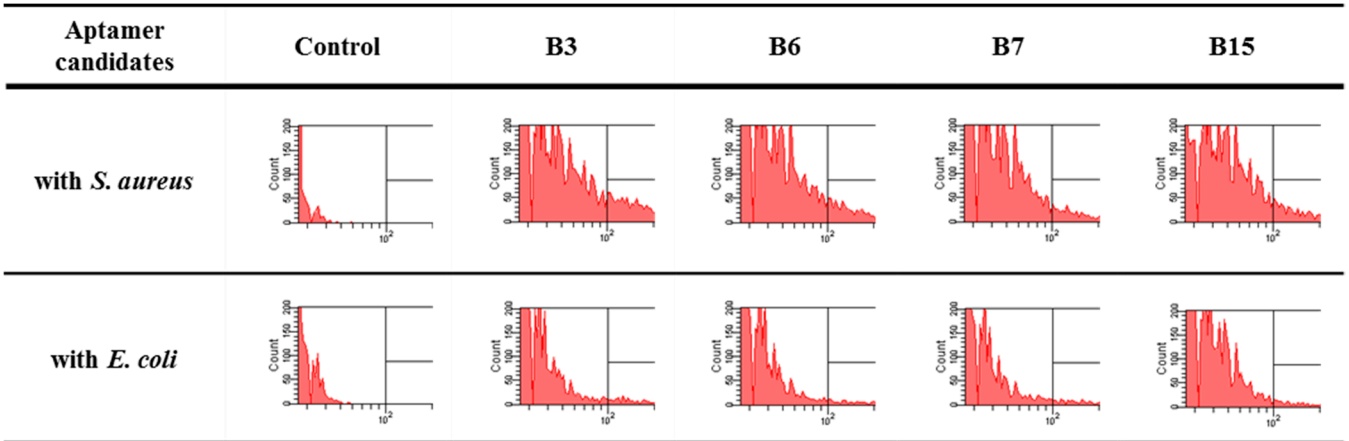

**Figure S2.** FACS analysis used to monitor the binding of FAM-aptamers to target/non-target bacteria in the modified whole-cell SELEX procedure.

© 2015 by the authors; licensee MDPI, Basel, Switzerland. This article is an open access article distributed under the terms and conditions of the Creative Commons Attribution license (<http://creativecommons.org/licenses/by/4.0/>).
